# Supplementary material for: Identification of a sixteen-microRNA signature as prognostic biomarker for stage II and III colon cancer
Source: PubMed Central journal article supplement (PMC5675676; doi:10.18632/oncotarget.21237), 2017-09-23
Supplement: oncotarget-08-87837-s001.pdf [file oncotarget-08-87837-s001.pdf]

# Identification of a sixteen-microRNA signature as prognostic biomarker for stage II and III colon cancer

## SUPPLEMENTARY MATERIALS

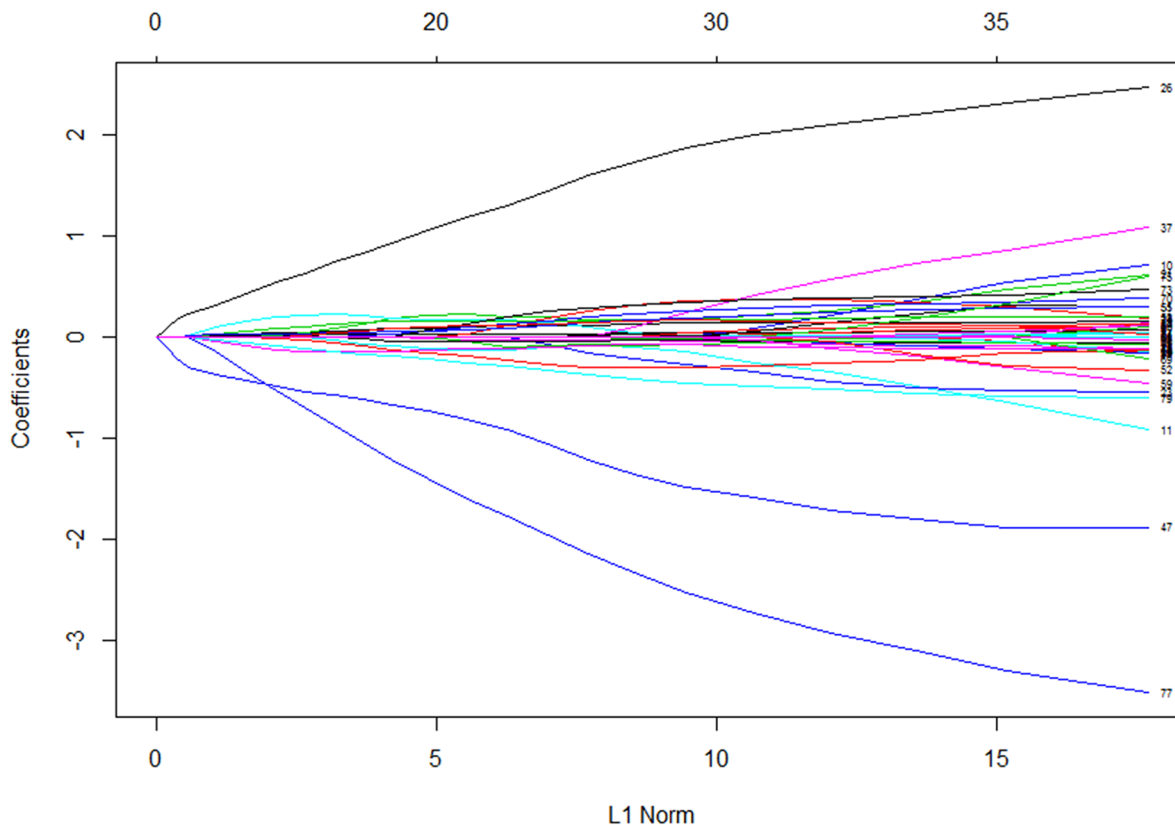

Supplementary Figure 1: The LASSO plot from LASSO regression analysis in the study cohort.

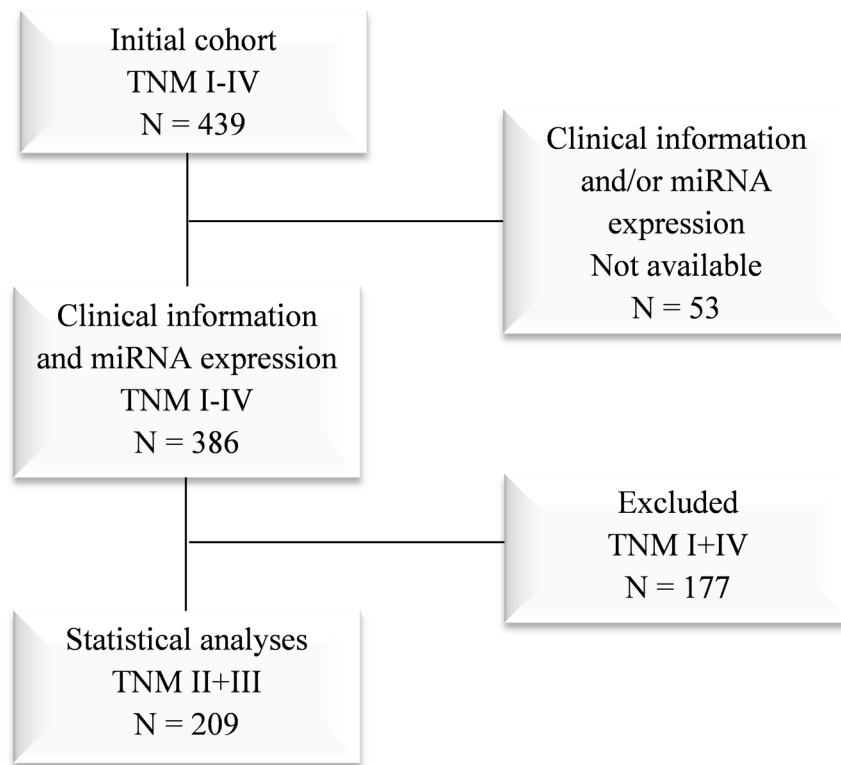

Supplementary Figure 2: Flowchart for the validation cohort (TCGA-COAD).

|   | 1                | 2                | 3               | 4               | 5              | 6              | 7              | 8              | 9               | 10              | 11              | 12              | 13              | 14              | 15              | 16              | 17              | 18              | 19              | 20              | 21             | 22             | 23             | 24             |
|---|------------------|------------------|-----------------|-----------------|----------------|----------------|----------------|----------------|-----------------|-----------------|-----------------|-----------------|-----------------|-----------------|-----------------|-----------------|-----------------|-----------------|-----------------|-----------------|----------------|----------------|----------------|----------------|
| A | hsa-miR-16-5p    | hsa-miR-16-5p    | hsa-miR-200a-3p | hsa-miR-200a-3p | hsa-miR-202-3p | hsa-miR-202-3p | hsa-miR-155-5p | hsa-miR-155-5p | hsa-miR-221-3p  | hsa-miR-221-3p  | hsa-miR-145-5p  | hsa-miR-145-5p  | hsa-miR-19b-3p  | hsa-miR-19b-3p  | hsa-miR-20a-5p  | hsa-miR-20a-5p  | hsa-miR-26a-5p  | hsa-miR-26a-5p  | hsa-miR-27a-3p  | hsa-miR-27a-3p  | hsa-miR-186-5p | hsa-miR-186-5p | hsa-miR-126-3p | hsa-miR-126-3p |
| B | hsa-miR-16-5p    | hsa-miR-16-5p    | hsa-miR-200a-3p | hsa-miR-200a-3p | hsa-miR-202-3p | hsa-miR-202-3p | hsa-miR-155-5p | hsa-miR-155-5p | hsa-miR-221-3p  | hsa-miR-221-3p  | hsa-miR-145-5p  | hsa-miR-145-5p  | hsa-miR-19b-3p  | hsa-miR-19b-3p  | hsa-miR-20a-5p  | hsa-miR-20a-5p  | hsa-miR-26a-5p  | hsa-miR-26a-5p  | hsa-miR-27a-3p  | hsa-miR-27a-3p  | hsa-miR-186-5p | hsa-miR-186-5p | hsa-miR-126-3p | hsa-miR-126-3p |
| C | UniSp3 IPC       | UniSp3 IPC       | hsa-miR-19a-3p  | hsa-miR-19a-3p  | hsa-miR-31-5p  | hsa-miR-31-5p  | hsa-let-7e-5p  | hsa-let-7e-5p  | hsa-miR-182-5p  | hsa-miR-182-5p  | hsa-miR-200b-3p | hsa-miR-200b-3p | hsa-miR-143-3p  | hsa-miR-143-3p  | hsa-miR-149-3p  | hsa-miR-149-3p  | hsa-miR-106b-5p | hsa-miR-106b-5p | hsa-miR-181a-5p | hsa-miR-181a-5p | 1              | 1              | hsa-miR-141-3p | hsa-miR-141-3p |
| D | UniSp3 IPC       | UniSp3 IPC       | hsa-miR-19a-3p  | hsa-miR-19a-3p  | hsa-miR-31-5p  | hsa-miR-31-5p  | hsa-let-7e-5p  | hsa-let-7e-5p  | hsa-miR-182-5p  | hsa-miR-182-5p  | hsa-miR-200b-3p | hsa-miR-200b-3p | hsa-miR-143-3p  | hsa-miR-143-3p  | hsa-miR-149-3p  | hsa-miR-149-3p  | hsa-miR-106b-5p | hsa-miR-106b-5p | hsa-miR-181a-5p | hsa-miR-181a-5p | 1              | 1              | hsa-miR-141-3p | hsa-miR-141-3p |
| E | hsa-miR-15b-5p   | hsa-miR-15b-5p   | hsa-miR-194-5p  | hsa-miR-194-5p  | 206            | 206            | hsa-miR-30b-5p | hsa-miR-30b-5p | hsa-miR-10a-5p  | hsa-miR-10a-5p  | hsa-miR-181b-5p | hsa-miR-181b-5p | UniSp3 IPC      | UniSp3 IPC      | hsa-miR-22-3p   | hsa-miR-22-3p   | hsa-miR-18a-5p  | hsa-miR-18a-5p  | hsa-miR-200c-3p | hsa-miR-200c-3p | hsa-miR-29c-3p | hsa-miR-29c-3p | UniSp6 CP      | UniSp6 CP      |
| F | hsa-miR-15b-5p   | hsa-miR-15b-5p   | hsa-miR-194-5p  | hsa-miR-194-5p  | 206            | 206            | hsa-miR-30b-5p | hsa-miR-30b-5p | hsa-miR-10a-5p  | hsa-miR-10a-5p  | hsa-miR-181b-5p | hsa-miR-181b-5p | UniSp3 IPC      | UniSp3 IPC      | hsa-miR-22-3p   | hsa-miR-22-3p   | hsa-miR-18a-5p  | hsa-miR-18a-5p  | hsa-miR-200c-3p | hsa-miR-200c-3p | hsa-miR-29c-3p | hsa-miR-29c-3p | UniSp6 CP      | UniSp6 CP      |
| G | hsa-miR-215-5p   | hsa-miR-215-5p   | hsa-miR-106a-5p | hsa-miR-106a-5p | 9-5p           | 9-5p           | hsa-miR-30d-5p | hsa-miR-30d-5p | hsa-miR-27b-3p  | hsa-miR-27b-3p  | hsa-miR-133a-3p | hsa-miR-133a-3p | hsa-miR-34a-5p  | hsa-miR-34a-5p  | hsa-miR-146a-5p | hsa-miR-146a-5p | hsa-miR-26b-5p  | hsa-miR-26b-5p  | 107             | 107             | hsa-miR-7b-5p  | hsa-miR-7b-5p  | hsa-miR-214-3p | hsa-miR-214-3p |
| H | hsa-miR-215-5p   | hsa-miR-215-5p   | hsa-miR-106a-5p | hsa-miR-106a-5p | 9-5p           | 9-5p           | hsa-miR-30d-5p | hsa-miR-30d-5p | hsa-miR-27b-3p  | hsa-miR-27b-3p  | hsa-miR-133a-3p | hsa-miR-133a-3p | hsa-miR-34a-5p  | hsa-miR-34a-5p  | hsa-miR-146a-5p | hsa-miR-146a-5p | hsa-miR-26b-5p  | hsa-miR-26b-5p  | hsa-miR-107     | hsa-miR-107     | hsa-miR-7b-5p  | hsa-miR-7b-5p  | hsa-miR-214-3p | hsa-miR-214-3p |
| I | hsa-let-7c-5p    | hsa-let-7c-5p    | hsa-miR-130a-3p | hsa-miR-130a-3p | hsa-miR-23a-3p | hsa-miR-23a-3p | hsa-miR-93-5p  | hsa-miR-93-5p  | hsa-miR-103a-3p | hsa-miR-103a-3p | hsa-miR-92b-3p  | hsa-miR-92b-3p  | hsa-miR-29b-3p  | hsa-miR-29b-3p  | hsa-let-7g-5p   | hsa-let-7g-5p   | hsa-miR-150-5p  | hsa-miR-150-5p  | hsa-miR-17-5p   | hsa-miR-17-5p   | hsa-miR-210-3p | hsa-miR-210-3p | UniSp6 CP      | UniSp6 CP      |
| J | hsa-let-7c-5p    | hsa-let-7c-5p    | hsa-miR-130a-3p | hsa-miR-130a-3p | hsa-miR-23a-3p | hsa-miR-23a-3p | hsa-miR-93-5p  | hsa-miR-93-5p  | hsa-miR-103a-3p | hsa-miR-103a-3p | hsa-miR-92b-3p  | hsa-miR-92b-3p  | hsa-miR-29b-3p  | hsa-miR-29b-3p  | hsa-let-7g-5p   | hsa-let-7g-5p   | hsa-miR-150-5p  | hsa-miR-150-5p  | hsa-miR-17-5p   | hsa-miR-17-5p   | hsa-miR-210-3p | hsa-miR-210-3p | UniSp6 CP      | UniSp6 CP      |
| K | Cel-miR-39-3p CP | Cel-miR-39-3p CP | hsa-miR-7-5p    | hsa-miR-7-5p    | hsa-miR-29a-3p | hsa-miR-29a-3p | hsa-miR-195-5p | hsa-miR-195-5p | hsa-miR-423-5p  | hsa-miR-423-5p  | hsa-miR-99a-5p  | hsa-miR-99a-5p  | hsa-miR-205-5p  | hsa-miR-205-5p  | hsa-miR-100-5p  | hsa-miR-100-5p  | hsa-miR-15a-5p  | hsa-miR-15a-5p  | hsa-miR-101-3p  | hsa-miR-101-3p  | hsa-miR-191-5p | hsa-miR-191-5p | hsa-miR-192-5p | hsa-miR-192-5p |
| L | Cel-miR-39-3p CP | Cel-miR-39-3p CP | hsa-miR-7-5p    | hsa-miR-7-5p    | hsa-miR-29a-3p | hsa-miR-29a-3p | hsa-miR-195-5p | hsa-miR-195-5p | hsa-miR-423-5p  | hsa-miR-423-5p  | hsa-miR-99a-5p  | hsa-miR-99a-5p  | hsa-miR-205-5p  | hsa-miR-205-5p  | hsa-miR-100-5p  | hsa-miR-100-5p  | hsa-miR-15a-5p  | hsa-miR-15a-5p  | hsa-miR-101-3p  | hsa-miR-101-3p  | hsa-miR-191-5p | hsa-miR-191-5p | hsa-miR-192-5p | hsa-miR-192-5p |
| M | hsa-miR-23b-3p   | hsa-miR-23b-3p   | hsa-let-7f-5p   | hsa-let-7f-5p   | hsa-miR-25-3p  | hsa-miR-25-3p  | hsa-let-7a-5p  | hsa-let-7a-5p  | hsa-miR-196a-5p | hsa-miR-196a-5p | hsa-miR-125b-5p | hsa-miR-125b-5p | hsa-miR-148a-3p | hsa-miR-148a-3p | hsa-miR-132-3p  | hsa-miR-132-3p  | hsa-miR-222-3p  | hsa-miR-222-3p  | hsa-let-7d-5p   | hsa-let-7d-5p   | hsa-let-7f-5p  | hsa-let-7f-5p  | hsa-miR-30c-5p | hsa-miR-30c-5p |
| N | hsa-miR-23b-3p   | hsa-miR-23b-3p   | hsa-let-7f-5p   | hsa-let-7f-5p   | hsa-miR-25-3p  | hsa-miR-25-3p  | hsa-let-7a-5p  | hsa-let-7a-5p  | hsa-miR-196a-5p | hsa-miR-196a-5p | hsa-miR-125b-5p | hsa-miR-125b-5p | hsa-miR-148a-3p | hsa-miR-148a-3p | hsa-miR-132-3p  | hsa-miR-132-3p  | hsa-miR-222-3p  | hsa-miR-222-3p  | hsa-let-7d-5p   | hsa-let-7d-5p   | hsa-let-7f-5p  | hsa-let-7f-5p  | hsa-miR-30c-5p | hsa-miR-30c-5p |
| O | hsa-miR-345-5p   | hsa-miR-345-5p   | hsa-miR-371a-5p | hsa-miR-371a-5p | hsa-miR-372-3p | hsa-miR-372-3p | hsa-miR-373-5p | hsa-miR-373-5p | hsa-miR-223-3p  | hsa-miR-223-3p  | UniSp3 IPC      | UniSp3 IPC      | hsa-miR-20b-5p  | hsa-miR-20b-5p  | hsa-miR-24-3p   | hsa-miR-24-3p   | hsa-miR-10b-5p  | hsa-miR-10b-5p  | hsa-miR-21-5p   | hsa-miR-21-5p   | hsa-miR-92a-3p | hsa-miR-92a-3p |                |                |
| P | hsa-miR-345-5p   | hsa-miR-345-5p   | hsa-miR-371a-5p | hsa-miR-371a-5p | hsa-miR-372-3p | hsa-miR-372-3p | hsa-miR-373-5p | hsa-miR-373-5p | hsa-miR-223-3p  | hsa-miR-223-3p  | UniSp3 IPC      | UniSp3 IPC      | hsa-miR-20b-5p  | hsa-miR-20b-5p  | hsa-miR-24-3p   | hsa-miR-24-3p   | hsa-miR-10b-5p  | hsa-miR-10b-5p  | hsa-miR-21-5p   | hsa-miR-21-5p   | hsa-miR-92a-3p | hsa-miR-92a-3p |                |                |

Supplementary Figure 3: Plate layout showing our Pick and Mix panel including the 84 miRNAs, inter-plate calibrators, and spike-in controls.
